# Supplementary material for: Metabolic Syndrome Prevalence in Women with Gestational Diabetes Mellitus in the Second Trimester of Gravidity
Source: MDPI journal article supplement (doi:10.3390/jcm13051260), 2024-02-22
Supplement: s1 [file s1]

**Supplementary Table S1**—The list of the clinical centres participated in this study.

| Clinical Center                                                                                                                                                                                                                                                                                       | Number of Women                                                |
|-------------------------------------------------------------------------------------------------------------------------------------------------------------------------------------------------------------------------------------------------------------------------------------------------------|----------------------------------------------------------------|
| Diabetes Centre, Internal clinic of the Faculty Hospital Brno (Jihlavská 20, Brno, Czech Republic),<br><br>web: <a href="https://www.fnbrno.cz/en/department-of-gastroenterology-and-internal-medicine/k1450">https://www.fnbrno.cz/en/department-of-gastroenterology-and-internal-medicine/k1450</a> | Enrollment of 455 GDM subjects (all participants of the study) |
| Obstetric and Gynaecology clinic of the Faculty Hospital Brno (Jihlavská 20, Brno, Czech Republic)<br><br>Web: <a href="https://www.fnbrno.cz/en/maternity-hospital/t6211">https://www.fnbrno.cz/en/maternity-hospital/t6211</a>                                                                      | Peripartal data 295 (65% of participants of the study)         |
